# Supplementary material
Source: PubMed Central journal article supplement (PMC3581403)
Supplement: supp_M112.405159_jbc.M112.405159-1.pdf [file supp_M112.405159_jbc.M112.405159-1.pdf]

**Table S1: N-terminal FGE amino acid sequences used for WebLogo generation.**

The 88 species used are listed and classified. The N-terminal FGE sequences were centered at P1 (Arg72 of human FGE) or based on a ClustalW alignment for group III that do not bear a R/K/X-Y-S-R/K/X motif. Sequences are given for the part that corresponds to the cleavage site P8-P8' and the core region of P4-P1 is marked in bold letters.

| Abbr.  | Species                        | Classification                                                                  | Sequence P8-P8'                                                                | number of sequences |
|--------|--------------------------------|---------------------------------------------------------------------------------|--------------------------------------------------------------------------------|---------------------|
| homSap | homo sapiens                   | euarchontoglires                                                                | AAAH <b>RY</b> SREANAPGPV                                                      | 36                  |
| panTro | pan troglodytes                |                                                                                 | AAAH <b>RY</b> SREANAPGPV                                                      |                     |
| gorGor | gorilla gorilla                |                                                                                 | AAAH <b>RY</b> SREANAPGPV                                                      |                     |
| ponAbe | pongo abelii                   |                                                                                 | AAAH <b>RY</b> SREANAPGPV                                                      |                     |
| nomLeu | nomascus leucogenys            |                                                                                 | AAAH <b>RY</b> SREANAPGPV                                                      |                     |
| rheMac | macaca mulatta                 |                                                                                 | GAAH <b>RY</b> SREANAPGSV                                                      |                     |
| macFas | macaca fascicularis            |                                                                                 | GAAH <b>RY</b> SREANAPGSV                                                      |                     |
| papHam | papio hamadryas                |                                                                                 | GAAH <b>RY</b> SREANAPGSV                                                      |                     |
| calJac | callithrix jacchus             |                                                                                 | AAAH <b>RY</b> SREANAPGPV                                                      |                     |
| tarSyr | tarsius syrichta               |                                                                                 | AAAH <b>RY</b> SREANAPGPF                                                      |                     |
| otoGar | otolemur garnettii             |                                                                                 | AAAH <b>RY</b> SREANAPGPI                                                      |                     |
| tupBel | tupaia belangeri               |                                                                                 | AAAH <b>RY</b> SREANVPGPV                                                      |                     |
| musMus | mus musculus                   |                                                                                 | AA <b>AQ</b> RY <b>S</b> REANAPGLT                                             |                     |
| ratNor | rattus norvegicus              |                                                                                 | AA <b>AQ</b> RY <b>S</b> REANAQGLT                                             |                     |
| speTri | spermophilus tridecemlineatus  |                                                                                 | SA <b>AH</b> RY <b>S</b> REANAP <b>S</b> AL                                    |                     |
| dipOrd | diplomys ordii                 |                                                                                 | AAAH <b>RY</b> SREANAPG <b>P</b>                                               |                     |
| oryCun | oryctolagus cuniculus          |                                                                                 | AA <b>AH</b> RY <b>S</b> REANAPGPV                                             |                     |
| ochPri | ochotona princeps              |                                                                                 | AA <b>AH</b> RY <b>S</b> REANAPGPV                                             |                     |
| canFam | canis familiaris               |                                                                                 | AAAH <b>RY</b> SREANAPG <b>V</b>                                               |                     |
| felCat | felis catus                    |                                                                                 | AAAH <b>RY</b> SREANAPG <b>V</b>                                               |                     |
| ursAme | ursus americanus               |                                                                                 | AAAH <b>RY</b> SREANAPG <b>V</b>                                               |                     |
| ailMel | ailuropoda melanoleuca         |                                                                                 | AAAH <b>RY</b> SREANAPG <b>V</b>                                               |                     |
| pteVam | pteropus vampyrus              |                                                                                 | AAAH <b>RY</b> SREANAAG <b>P</b>                                               |                     |
| turTru | tursiops truncatus             |                                                                                 | AAAH <b>RY</b> SREANAPG <b>S</b> V                                             |                     |
| susScr | sus scrofa                     |                                                                                 | AA <b>AQ</b> RY <b>S</b> REANAPGPV                                             |                     |
| equCab | equus caballus                 |                                                                                 | AAAH <b>RY</b> SREANAPG <b>S</b> G                                             |                     |
| bosTau | bos taurus                     |                                                                                 | AAAH <b>RY</b> SREANAPG <b>S</b> V                                             |                     |
| capHir | capra hircus                   |                                                                                 | AAAH <b>RY</b> SREANAPG <b>S</b> V                                             |                     |
| oviAri | ovis aries                     |                                                                                 | AA <b>PH</b> RY <b>S</b> REANAPG <b>S</b> V                                    |                     |
| eriEur | erinaceus europae              |                                                                                 | AAAH <b>RY</b> SREANAPG <b>P</b> D                                             |                     |
| loxAfr | loxodonta africana             |                                                                                 | AAAH <b>RY</b> SREANVPG <b>P</b> V                                             |                     |
| mamPri | mammuthus primigenius          |                                                                                 | AAAH <b>RY</b> SREANVPG <b>P</b> V                                             |                     |
| proCap | procavia capensis              |                                                                                 | AAAH <b>RY</b> SREANVPG <b>P</b> V                                             |                     |
| echTel | echinops telfairi              |                                                                                 | AAAH <b>RY</b> SREANAPG <b>L</b> G                                             |                     |
| dasNov | dasyypus novemcinctus          |                                                                                 | AA <b>AH</b> RY <b>S</b> REANAQ <b>G</b> RA                                    |                     |
| choHof | choloepus hoffmanni            |                                                                                 | AAAH <b>RY</b> SREANAPG <b>R</b> A                                             |                     |
| monDom | monodelphis domestica          | marsupials                                                                      | SA <b>AH</b> RY <b>S</b> REANVA <b>E</b> PA                                    | 22                  |
| macEuq | macropus euqenii               |                                                                                 | SA <b>AH</b> RY <b>S</b> REANVA <b>E</b> RA                                    |                     |
| anoCar | anolis carolinensis            |                                                                                 | VA <b>SR</b> KRY <b>S</b> REVHL <b>P</b> Q <b>P</b>                            |                     |
| galGal | gallus gallus                  |                                                                                 | VA <b>TV</b> RY <b>S</b> AA <b>A</b> NDGR <b>S</b> P                           |                     |
| melGal | meleagris gallopavo            |                                                                                 | AA <b>AR</b> RY <b>S</b> AVANGGR <b>S</b> S                                    |                     |
| allMis | alligator mississippiensis     |                                                                                 | AA <b>VR</b> RY <b>S</b> PEANAQ <b>R</b> GP                                    |                     |
| pytMol | python molurus                 |                                                                                 | VA <b>AR</b> KRY <b>S</b> LDANV <b>S</b> Q <b>P</b>                            |                     |
| ambMex | ambystoma mexicanum            |                                                                                 | HRA <b>AR</b> RY <b>S</b> REANE <b>P</b> LKA                                   |                     |
| xenTro | xenopus tropicalis             |                                                                                 | DS <b>PH</b> KRY <b>S</b> REANE <b>P</b> EPA                                   |                     |
| xenLae | xenopus laevis                 |                                                                                 | EN <b>SH</b> KRY <b>S</b> REANE <b>P</b> EPT                                   |                     |
| takRub | takifugu rubripes              |                                                                                 | VD <b>GA</b> KRY <b>S</b> RCASRRD <b>T</b>                                     |                     |
| tetNig | tetraodon nigroviridis         |                                                                                 | EP <b>GP</b> KRY <b>S</b> RGANGR <b>D</b> ED                                   |                     |
| danReq | danio rerio                    | DV <b>NR</b> IY <b>S</b> KTANEG <b>P</b> DD                                     |                                                                                |                     |
| oncMyk | oncorhynchus mykiss            | KE <b>SS</b> KRY <b>S</b> KKSNER <b>H</b> TD                                    |                                                                                |                     |
| salSal | salmo salar salmon             | KE <b>SS</b> KRY <b>S</b> KKSNER <b>H</b> TD                                    |                                                                                |                     |
| oryLat | oryzias latipes                | M <b>TE</b> PKRY <b>S</b> AGSK <b>S</b> NGG                                     |                                                                                |                     |
| ictPun | ictalurus punctatus            | DE <b>DG</b> KRY <b>S</b> ERANKE <b>F</b> VG                                    |                                                                                |                     |
| ictFur | ictalurus furcatus             | DE <b>DG</b> KRY <b>S</b> ERANKE <b>F</b> VG                                    |                                                                                |                     |
| gasAcu | gasterosteus aculeatus         | EE <b>GS</b> KRY <b>S</b> EGANGR <b>F</b> VQ                                    |                                                                                |                     |
| oreNil | oreochromis niloticus          | LD <b>ED</b> KRY <b>S</b> KDANDR <b>T</b> NO                                    |                                                                                |                     |
| osmMor | osmerus mordax                 | SH <b>ASK</b> Y <b>L</b> QTTNE <b>K</b> P <b>T</b> L                            |                                                                                |                     |
| esoLuc | esox lucius                    | RE <b>SG</b> IY <b>S</b> KTSNE <b>K</b> L <b>T</b> D                            |                                                                                |                     |
| cioInt | ciona intestinalis*            | urochordates                                                                    | EVA <b>E</b> EPDLPLQ <b>V</b> SSD                                              | 30                  |
| cioSav | ciona savignyi*                |                                                                                 | EVE <b>E</b> EPDIPL <b>P</b> T <b>I</b> PTG                                    |                     |
| halRor | halocynthia roretzi*           | MD <b>Q</b> EV <b>T</b> ENAE <b>Q</b> HL <b>V</b> E                             |                                                                                |                     |
| oikDio | oikopleura dioica              | AG <b>T</b> FT <b>M</b> GDNEEL <b>M</b> PGD                                     |                                                                                |                     |
| braFlo | branchiostoma floridae*        | P <b>V</b> EG <b>G</b> GA <b>E</b> AP <b>F</b> DKD                              |                                                                                |                     |
| strPur | strongylocentrotus purpuratus* | AL <b>E</b> EKRY <b>S</b> REAN <b>D</b> P <b>I</b> DH                           |                                                                                |                     |
| parLiv | paracentrotus lividus          | PL <b>L</b> AL <b>K</b> RY <b>S</b> KEVNDAT <b>G</b> S                          |                                                                                |                     |
| sacKow | saccoglossus kowalevskii*      | K <b>S</b> GG <b>V</b> ND <b>H</b> H <b>G</b> VE <b>Q</b> HD                    |                                                                                |                     |
| droMel | drosophila melanogaster        | hemichordates                                                                   | SG <b>Q</b> VC <b>Q</b> RA <b>Q</b> AG <b>H</b> SHY                            |                     |
| anoGam | anopheles gambiae              |                                                                                 | K <b>E</b> RV <b>I</b> FP <b>T</b> DA <b>A</b> Q <b>H</b> SP <b>S</b>          |                     |
| mayDes | mayetiola destructor           |                                                                                 | SN <b>E</b> N <b>K</b> DD <b>S</b> SN <b>E</b> M <b>C</b> SN <b>P</b>          |                     |
| bomMor | bombyx mori                    |                                                                                 | LY <b>S</b> GN <b>N</b> EQ <b>C</b> S <b>V</b> EN <b>I</b> S                   |                     |
| apimel | apis mellifera                 |                                                                                 | Y <b>K</b> KE <b>I</b> Q <b>D</b> S <b>C</b> L <b>A</b> ND <b>I</b> L <b>H</b> |                     |
| camFlo | camponotus floridanus          |                                                                                 | G <b>Y</b> C <b>V</b> DN <b>S</b> K <b>F</b> DA <b>I</b> D <b>I</b> N          |                     |
| acyPis | acyrthosiphon pisum            |                                                                                 | V <b>C</b> T <b>S</b> A <b>T</b> S <b>N</b> S <b>E</b> R <b>L</b> D <b>S</b> E |                     |
| rhoPro | rhodnius prolixus              |                                                                                 | C <b>I</b> P <b>S</b> S <b>F</b> LD <b>L</b> I <b>K</b> Q <b>T</b> REN         |                     |
| pedHum | pediculus humanus              |                                                                                 | K <b>V</b> N <b>F</b> K <b>D</b> DA <b>I</b> F <b>E</b> EQ <b>E</b> I <b>S</b> |                     |
| triCas | tribolium castaneum            |                                                                                 | EP <b>N</b> KRY <b>S</b> K <b>T</b> F <b>N</b> EG <b>G</b> DS                  |                     |
| denPon | dendroctonus ponderosae        |                                                                                 | N <b>P</b> S <b>Q</b> KRY <b>K</b> R <b>D</b> L <b>N</b> EN <b>P</b> AN        |                     |
| lepDec | leptinotarsa decemlineata      |                                                                                 | N <b>P</b> SH <b>K</b> Y <b>M</b> K <b>E</b> S <b>N</b> E <b>T</b> GN          |                     |
| eriSin | eriocheir sinensis             | S <b>P</b> E <b>T</b> S <b>P</b> V <b>L</b> EN <b>N</b> E <b>S</b> P <b>N</b>   |                                                                                |                     |
| ambVar | amblyomma variegatum           | G <b>S</b> T <b>S</b> DD <b>D</b> E <b>S</b> R <b>V</b> E <b>D</b>              |                                                                                |                     |
| rhiMic | rhipicephalus microplus        | N <b>H</b> DE <b>K</b> AR <b>L</b> DS <b>E</b> NA <b>A</b> L <b>N</b>           |                                                                                |                     |
| aplCal | aplysia californica            | S <b>Q</b> AP <b>E</b> SS <b>D</b> PS <b>G</b> S <b>V</b> GD                    |                                                                                |                     |
| lotGig | lottia gigantea                | K <b>G</b> SE <b>Q</b> AD <b>D</b> K <b>S</b> G <b>M</b> Y <b>H</b> P <b>Q</b>  |                                                                                |                     |
| nemVec | nematostella vectensis         | K <b>K</b> F <b>V</b> KRY <b>S</b> KAN <b>V</b> D <b>D</b> I                    |                                                                                |                     |
| acrMil | acropora millepora             | K <b>I</b> T <b>D</b> R <b>K</b> NG <b>E</b> G <b>K</b> F <b>N</b> L <b>K</b> S |                                                                                |                     |
| monFav | montastraea faveolata          | M <b>T</b> L <b>T</b> NG <b>T</b> D <b>G</b> E <b>I</b> K <b>L</b> K <b>S</b>   |                                                                                |                     |
| plePil | pleurobrachia pileus           | K <b>I</b> S <b>D</b> M <b>K</b> R <b>N</b> E <b>Q</b> S <b>E</b> H <b>P</b> N  |                                                                                |                     |
| ampQue | amphimedon queenslandica       | S <b>V</b> E <b>K</b> E <b>S</b> E <b>P</b> K <b>A</b> Q <b>A</b> E             |                                                                                |                     |

\* intronated differently
